# Supplementary material for: Single-cell transcriptomic classification of rabies-infected cortical neurons
Source: PubMed Central journal article supplement (PMC9295789; doi:10.1073/pnas.2203677119), 2022-05-24
Supplement: pnas.2203677119.sapp.pdf [file pnas.2203677119.sapp.pdf]

## **Supplementary Information for** Single-cell transcriptomic classification of rabies-infected cortical neurons

Maribel Patiño<sup>1,2,3</sup>, Will N. Lagos<sup>1</sup>, Neelakshi S. Patne<sup>1</sup>, Bosiljka Tasic<sup>4</sup>, Hongkui Zeng<sup>4</sup>, Edward M. Callaway<sup>1,\*</sup>

Edward M. Callaway  
Email: callaway@salk.edu

### **This PDF file includes:**

Supplementary text  
Figures S1 to S2  
Legends for supplemental tables

### **Other supplementary materials for this manuscript include the following:**

Table S1 and S2

## **Supplemental Information**

Supplemental tables below are provided separately as Excel files

**Table S1. List of Differentially Expressed Genes in Rabies-Infected Nuclei Compared to Control, Related to Figure 1.**

**Table S2. List of Cell-Type-Specific Differentially Expressed Genes in Rabies-Infected Nuclei Compared to Control, Related to Figure 4.**

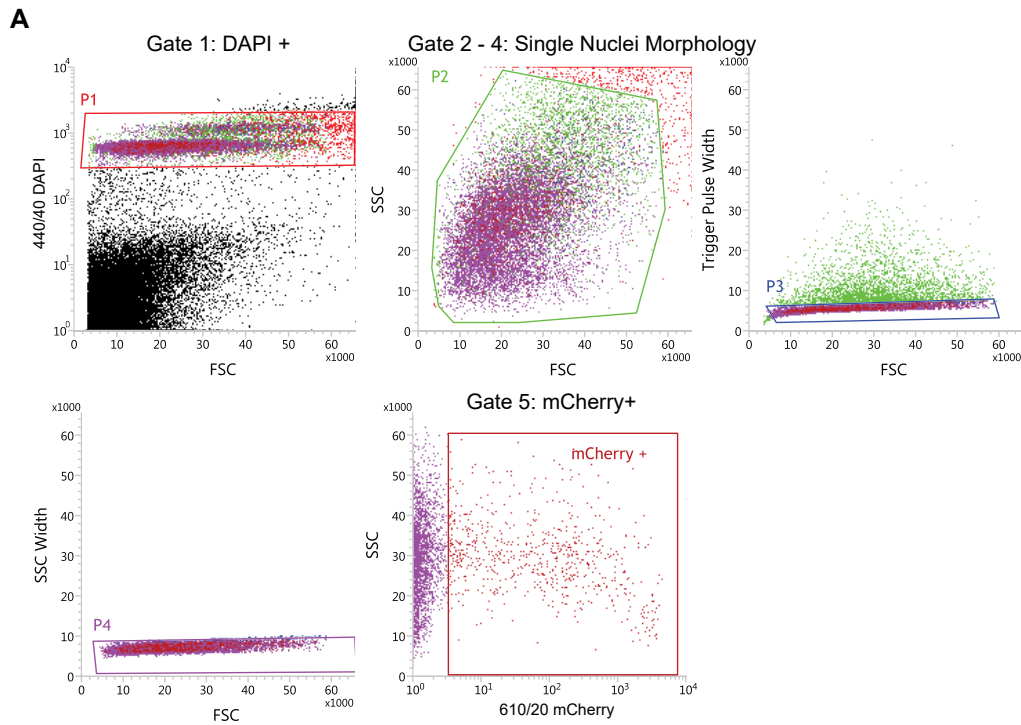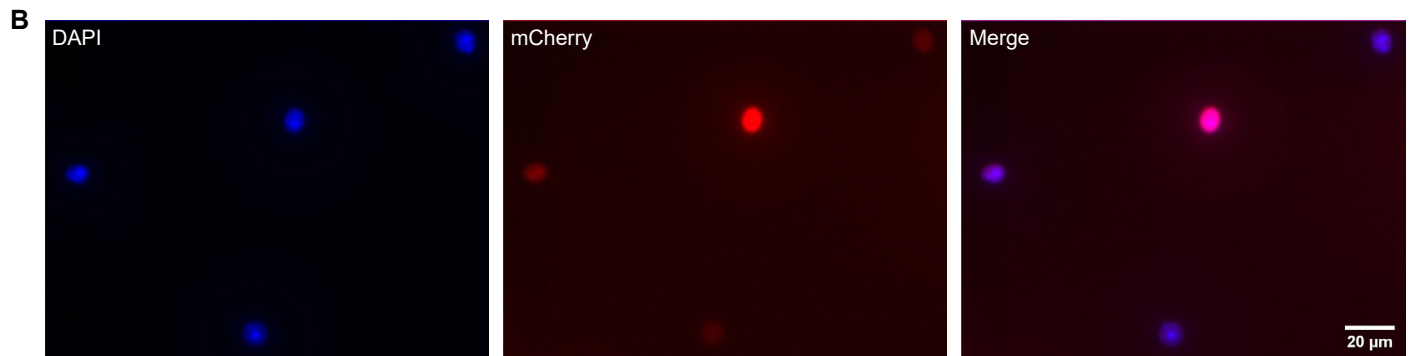

**Figure S1. Details on rabies-infected fluorescence-activated nuclei sorting, related to Figure 1**  
 (A) Detailed gating strategy of fluorescence-activated nuclei sorting. Gate 1 selects for DAPI+ nuclei to exclude debris. Gate 2 -4 exclude cell doublets based on single nuclei morphology. Gate 5 selects for mCherry+ fluorescence.  
 (B) Post-sorting visualization of sorted mCherry+ nuclei for quality control.

**A**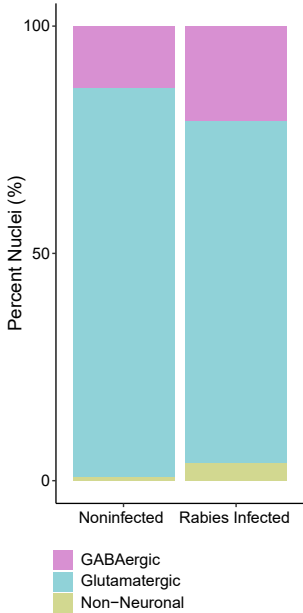**B**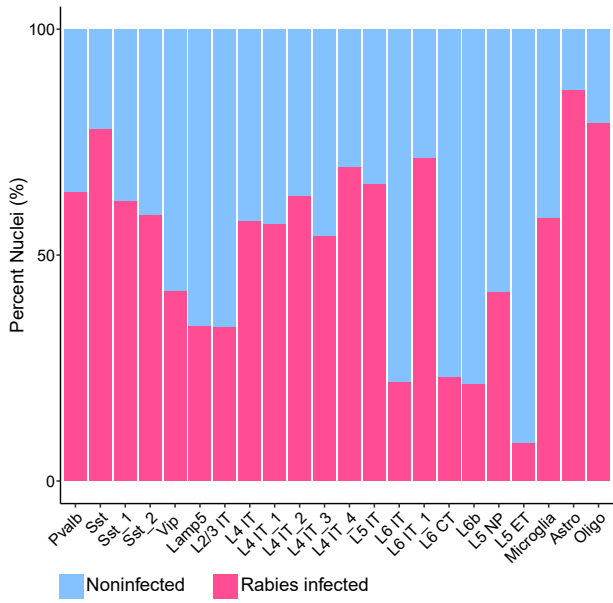**C**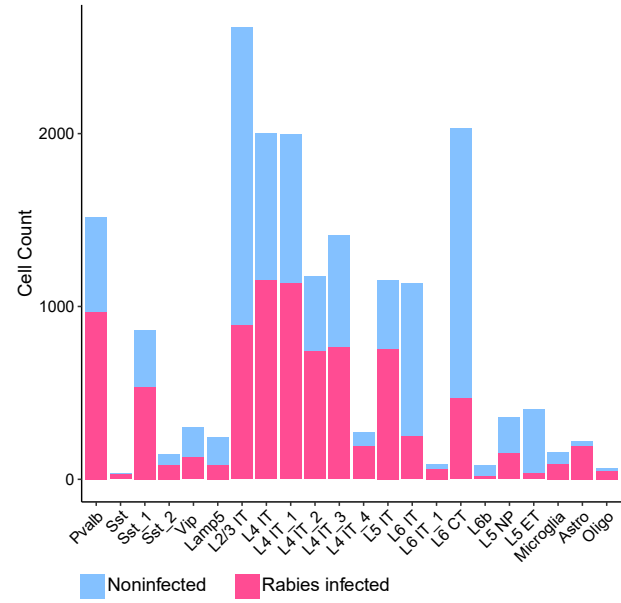

**Figure S2. Cell type composition of datasets, related to Figure 2**

- (A) Percent of excitatory, inhibitory, and non-neuronal nuclei across experimental groups.
- (B) Percent distribution of rabies-infected and uninfected nuclei in each cluster.
- (C) Absolute count of rabies-infected and uninfected nuclei in each cluster.
